# Supplementary material for: Physical exercise and goal attainment after shunt surgery in idiopathic normal pressure hydrocephalus: a randomised clinical trial
Source: Springer Nature journal article supplement (doi:10.1186/s12987-021-00287-8), 2021-11-22
Supplement: MOESM2 [file 19890032]

# The iNPH scale

## Gait domain

The rating from an ordinal gait scale and the results from the 10-metre walk test (number of steps and time in seconds, mean of two consecutive trails) are converted to the following scores from 0 to 100. A mean gait domain score is calculated from the available converted scores.

| <b>Ordinal rating of gait</b>                               | <b>10 m walk test<br/>(steps)</b> | <b>10 m walk test<br/>(seconds)</b> |
|-------------------------------------------------------------|-----------------------------------|-------------------------------------|
| 1. Normal gait = 100                                        | <15.50 = 100                      | <8.75 = 100                         |
| 2. Slight disturbance of tandem walk and turning = 86       | 15.50–16.50 = 90                  | 8.75–9.25 = 90                      |
|                                                             | 16.75–17.25 = 80                  | 9.50–9.75 = 80                      |
| 3. Wide-based gait with sway, without foot corrections = 71 | 17.50–18.00 = 70                  | 10.00–10.25 = 70                    |
|                                                             | 18.25–19.25 = 60                  | 10.50–10.75 = 60                    |
| 4. Tendency to fall, with foot corrections = 57             | 19.50–20.25 = 50                  | 11.00–11.50 = 50                    |
|                                                             | 20.50–21.25 = 40                  | 11.75–13.00 = 40                    |
| 5. Walking with cane = 43                                   | 21.50–23.75 = 30                  | 13.25–16.00 = 30                    |
| 6. Bi-manual support needed = 29                            | 24.00–27.25 = 20                  | 16.25–19.25 = 20                    |
|                                                             | 27.50–40.00 = 10                  | 19.50–27.00 = 10                    |
| 7. Aided = 14                                               | >40 or fail = 0                   | >27 or fail = 0                     |
| 8. Wheelchair bound = 0                                     |                                   |                                     |

## Balance domain

The ordinal balance scale score is converted to the following balance domain scores from 0 to 100.

| <b>Ordinal rating of balance</b>                                                             |
|----------------------------------------------------------------------------------------------|
| 1. Able to stand independently for more than 30 s on either lower extremity alone = 100      |
| 2. Able to stand independently for 5 - 30 s on either lower extremity alone = 83             |
| 3. Able to stand independently with the feet together (at the heels) for more than 30 s = 67 |
| 4. Able to stand independently with the feet together for 5 - 30 s = 50                      |
| 5. Able to stand independently with the feet apart (one foot length) for more than 30 s = 33 |
| 6. Able to stand independently with the feet apart for 5 - 30 s = 17                         |
| 7. Unable to stand without assistance = 0                                                    |

## Neuropsychology domain

The results from four separate tests are converted to the following scores from 0 to 100. A mean neuropsychology domain score is calculated from the available converted scores.

| <b>Grooved pegboard</b><br>(fastest trial) | <b>Rey Auditory<br/>Verbal Learning<br/>Test</b><br>(sum of five trials) | <b>Stroop,<br/>colour-naming</b> | <b>Stroop,<br/>interference</b> |
|--------------------------------------------|--------------------------------------------------------------------------|----------------------------------|---------------------------------|
| <79 = 100                                  | >44 = 100                                                                | <68 = 100                        | <132 = 100                      |
| 79–87 = 90                                 | 38–44 = 90                                                               | 68–77 = 90                       | 132–160 = 90                    |
| 88–96 = 80                                 | 32–37 = 80                                                               | 78–81 = 80                       | 161–188 = 80                    |
| 97–105 = 70                                | 30–31 = 70                                                               | 82–87 = 70                       | 189–210 = 70                    |
| 106–114 = 60                               | 28–29 = 60                                                               | 88–96 = 60                       | 211–239 = 60                    |
| 115–128 = 50                               | 26–27 = 50                                                               | 97–106 = 50                      | 240–298 = 50                    |
| 129–144 = 40                               | 22–25 = 40                                                               | 107–121 = 40                     | 299–385 = 40                    |
| 145–173 = 30                               | 19–21 = 30                                                               | 122–134 = 30                     | 386–600 = 30                    |
| 174–245 = 20                               | 15–18 = 20                                                               | 135–171 = 20                     | >600 = 20                       |
| 246–600 = 10                               | 11–14 = 10                                                               | 172–300 = 10                     | Fail = 10                       |
| >600 or fail = 0                           | <11 or fail = 0                                                          | >300 or fail = 0                 |                                 |

## Continence domain

The ordinal continence scale score is converted to the following continence domain scores from 0 to 100.

| <b>Ordinal rating of continence</b>                                                    |
|----------------------------------------------------------------------------------------|
| 1 Normal = 100                                                                         |
| 2 Urgency without incontinence = 80                                                    |
| 3 Infrequent (not daily) incontinence without napkin = 60                              |
| 4 Frequent incontinence with napkin = 40                                               |
| 5 Bladder incontinence (i.e. complete loss of bladder control) = 20                    |
| 6 Bladder and bowel incontinence (i.e. complete loss of bladder and bowel control) = 0 |

### Total iNPH score

The total iNPH scale score is the mean of the available domain scores with the gait domain score x 2.

| <b>Total iNPH score</b>                                                                                                                                                     |
|-----------------------------------------------------------------------------------------------------------------------------------------------------------------------------|
| $\frac{2 \times \text{Gait domain} + \text{Balance domain} + \text{Neuropsychology domain} + \text{Continenence domain}}{5 \text{ (or number of available domain scores)}}$ |

### **Reference**

Hellström P, Klinge P, Tans J, Wikkelsø C. A new scale for assessment of severity and outcome in iNPH. Acta Neurol Scand. 2012 May 16. doi:10.1111/j.1600-0404.2012.01677.x.
