# Supplementary material for: Physical exercise and goal attainment after shunt surgery in idiopathic normal pressure hydrocephalus: a randomised clinical trial
Source: Springer Nature journal article supplement (doi:10.1186/s12987-021-00287-8), 2021-11-22
Supplement: MOESM3 [file 19890032]

### Changes from baseline in primary and secondary iNPH scale scores for the ITT population

|                                  | Exercise group<br>(n = 50) | p-value<br>within<br>group | Control group<br>(n = 59) | p-value<br>within<br>group | p-value<br>between<br>groups | Difference<br>between groups<br>Mean (95% CI) |
|----------------------------------|----------------------------|----------------------------|---------------------------|----------------------------|------------------------------|-----------------------------------------------|
| <b>Primary outcome</b>           |                            |                            |                           |                            |                              |                                               |
| Total iNPH scale score (0-100)   |                            |                            |                           |                            |                              |                                               |
| Baseline                         |                            |                            |                           |                            |                              |                                               |
| Mean (SD)                        | 58.7 (15.3)                |                            | 55.4 (16.3)               |                            | 0.28                         | 3.27 (-2.72; 9.34)                            |
| Median (min;max)                 | 60.5 (27.2; 91.1)          |                            | 52.9 (22; 89.6)           |                            |                              |                                               |
|                                  | 50                         |                            | 59                        |                            |                              |                                               |
| Post-intervention                |                            |                            |                           |                            |                              |                                               |
|                                  | 74.5 (15.9)                |                            | 70.5 (15.9)               |                            | 0.19                         | 4.05 (-2.07; 10.14)                           |
|                                  | 78.1 (27.3; 97.5)          |                            | 72.7 (34.2; 100)          |                            |                              |                                               |
|                                  | n = 50                     |                            | n = 58                    |                            |                              |                                               |
| Change from baseline             |                            | <b>&lt;.0001</b>           |                           | <b>&lt;.0001</b>           |                              |                                               |
|                                  | 15.9 (13.2)                |                            | 14.9 (12.2)               |                            |                              | 0.94 (-3.86; 5.84)                            |
|                                  | 14.2 (-21.4; 48.4)         |                            | 13.4 (-11.5; 53.3)        |                            |                              |                                               |
|                                  | n = 50                     |                            | n = 58                    |                            |                              |                                               |
| 6-month follow-up                |                            |                            |                           |                            |                              |                                               |
|                                  | 77.8 (14.4)                |                            | 73.4 (17.1)               |                            | 0.18                         | 4.38 (-2.12; 10.84)                           |
|                                  | 81.2 (47.2; 99.5)          |                            | 77.9 (35.2; 99.5)         |                            |                              |                                               |
|                                  | n = 43                     |                            | n = 52                    |                            |                              |                                               |
| Change from baseline             |                            | <b>&lt;.0001</b>           |                           | <b>&lt;.0001</b>           | 0.41                         | 2.09 (-3.05; 7.14)                            |
|                                  | 19.1 (12.5)                |                            | 17.0 (12.5)               |                            |                              |                                               |
|                                  | 16.2 (-3.3; 49.4)          |                            | 15.4 (-15.7; 41.1)        |                            |                              |                                               |
|                                  | n = 43                     |                            | n = 52                    |                            |                              |                                               |
| <b>Secondary outcomes</b>        |                            |                            |                           |                            |                              |                                               |
| Gait iNPH scale score (0-100)    |                            |                            |                           |                            |                              |                                               |
| Baseline                         |                            |                            |                           |                            |                              |                                               |
|                                  | 53.3 (22.9)                |                            | 50.9 (23.7)               |                            | 0.59                         | 2.37 (-6.49; 11.22)                           |
|                                  | 50.5 (9.7; 100)            |                            | 43.7 (9.7; 100)           |                            |                              |                                               |
|                                  | n = 50                     |                            | n = 59                    |                            |                              |                                               |
| Post-intervention                |                            |                            |                           |                            |                              |                                               |
|                                  | 74.9 (23.0)                |                            | 70.1 (26.0)               |                            | 0.31                         | 4.78 (-4.55; 14.21)                           |
|                                  | 82 (19.7; 100)             |                            | 72.8 (16.3; 100)          |                            |                              |                                               |
|                                  | n = 50                     |                            | n = 58                    |                            |                              |                                               |
| Change from baseline             |                            | <b>&lt;.0001</b>           |                           | <b>&lt;.0001</b>           | 0.44                         | 2.76 (-4.25; 9.83)                            |
|                                  | 21.6 (17.3)                |                            | 18.8 (19.4)               |                            |                              |                                               |
|                                  | 21.5 (-36; 66.3)           |                            | 17 (-18.3; 60.7)          |                            |                              |                                               |
|                                  | n = 50                     |                            | n = 58                    |                            |                              |                                               |
| 6-month follow-up                |                            |                            |                           |                            |                              |                                               |
|                                  | 79.8 (21.7)                |                            | 73.4 (25.9)               |                            | 0.20                         | 6.39 (-3.41; 16.20)                           |
|                                  | 85.3 (25.7; 100)           |                            | 82 (16.3; 100)            |                            |                              |                                               |
|                                  | n = 43                     |                            | n = 52                    |                            |                              |                                               |
| Change from baseline             |                            | <b>&lt;.0001</b>           |                           | <b>&lt;.0001</b>           | 0.18                         | 5.32 (-2.50; 13.07)                           |
|                                  | 26.9 (17.2)                |                            | 21.6 (20.6)               |                            |                              |                                               |
|                                  | 27.3 (-0.7; 76.3)          |                            | 18.2 (-30; 69.7)          |                            |                              |                                               |
|                                  | n = 43                     |                            | n = 52                    |                            |                              |                                               |
| Balance iNPH scale score (0-100) |                            |                            |                           |                            |                              |                                               |
| Baseline                         |                            |                            |                           |                            |                              |                                               |
|                                  | 68.8 (14.1)                |                            | 67.0 (15.9)               |                            | 0.56                         | 1.73 (-4.00; 7.48)                            |
|                                  | 67 (33; 100)               |                            | 67 (17; 100)              |                            |                              |                                               |
|                                  | n = 50                     |                            | n = 59                    |                            |                              |                                               |
| Post-intervention                |                            |                            |                           |                            |                              |                                               |
|                                  | 76.7 (11.5)                |                            | 74.5 (10.2)               |                            | 0.32                         | 2.20 (-1.92; 6.32)                            |
|                                  | 83 (50; 100)               |                            | 67 (50; 100)              |                            |                              |                                               |
|                                  | n = 50                     |                            | n = 58                    |                            |                              |                                               |
| Change from baseline             |                            | <b>0.0006</b>              |                           | <b>0.0004</b>              | 0.98                         | 0.196 (-5.731; 6.045)                         |
|                                  | 7.92 (16.14)               |                            | 7.72 (14.96)              |                            |                              |                                               |
|                                  | 0 (-17; 67)                |                            | 0 (-17; 50)               |                            |                              |                                               |
|                                  | n = 50                     |                            | n = 58                    |                            |                              |                                               |
| 6-month follow-up                |                            |                            |                           |                            |                              |                                               |
|                                  | 80.9 (11.1)                |                            | 74.7 (11.9)               |                            | <b>0.0081</b>                | 6.28 (1.52; 11.00)                            |
|                                  | 83 (67; 100)               |                            | 83 (33; 100)              |                            |                              |                                               |
|                                  | n = 43                     |                            | n = 52                    |                            |                              |                                               |
| Change from baseline             |                            | <b>&lt;.0001</b>           |                           | <b>0.0025</b>              | <b>0.039</b>                 | 5.90 (0.54; 11.28)                            |
|                                  | 11.9 (14.2)                |                            | 5.96 (12.69)              |                            |                              |                                               |
|                                  | 16 (0; 67)                 |                            | 0 (-34; 34)               |                            |                              |                                               |
|                                  | n = 43                     |                            | n = 52                    |                            |                              |                                               |

Neuropsychology iNPH scale score (0-100)

|                      |                                           |                  |                                          |                  |      |                     |
|----------------------|-------------------------------------------|------------------|------------------------------------------|------------------|------|---------------------|
| Baseline             | 57.0 (18.6)<br>57.5 (20; 87.5)<br>n = 50  |                  | 55.0 (19.2)<br>52.5 (17.5; 95)<br>n = 59 |                  | 0.61 | 1.91 (-5.36; 9.09)  |
| Post-intervention    | 67.1 (16.8)<br>68.8 (25; 95)<br>n = 50    |                  | 62.8 (19.6)<br>65 (12.5; 100)<br>n = 57  |                  | 0.24 | 4.29 (-2.81; 11.39) |
| Change from baseline | 10.2 (11.2)<br>8.8 (-25; 32.5)<br>n = 50  | <b>&lt;.0001</b> | 8.16 (12.31)<br>7.5 (-30; 45)<br>n = 57  | <b>&lt;.0001</b> | 0.40 | 1.99 (-2.50; 6.54)  |
| 6-month follow-up    | 68.5 (18.2)<br>70 (25; 97.5)<br>n = 43    |                  | 66.9 (20.7)<br>70 (17.5; 100)<br>n = 51  |                  | 0.69 | 1.63 (-6.36; 9.69)  |
| Change from baseline | 11.6 (11.1)<br>12.5 (-15; 37.5)<br>n = 43 | <b>&lt;.0001</b> | 10.4 (11.0)<br>7.5 (-20; 35)<br>n = 51   | <b>&lt;.0001</b> | 0.62 | 1.19 (-3.37; 5.68)  |

Continence iNPH scale score (0-100)

|                      |                                        |                  |                                        |                  |      |                      |
|----------------------|----------------------------------------|------------------|----------------------------------------|------------------|------|----------------------|
| Baseline             | 61.2 (28.7)<br>60 (0; 100)<br>n = 50   |                  | 53.2 (30.3)<br>40 (0; 100)<br>n = 59   |                  | 0.18 | 7.98 (-3.48; 19.29)  |
| Post-intervention    | 79.2 (28.6)<br>90 (0; 100)<br>n = 50   |                  | 74.3 (26.6)<br>80 (0; 100)<br>n = 56   |                  | 0.39 | 4.91 (-5.71; 15.71)  |
| Change from baseline | 18.0 (29.8)<br>10 (-40; 100)<br>n = 50 | <b>&lt;.0001</b> | 21.1 (28.4)<br>10 (-20; 100)<br>n = 56 | <b>&lt;.0001</b> | 0.64 | -3.07 (-14.29; 8.00) |
| 6-month follow-up    | 80.0 (23.1)<br>80 (0; 100)<br>n = 43   |                  | 78.5 (27.7)<br>100 (0; 100)<br>n = 52  |                  | 0.83 | 1.54 (-9.00; 12.17)  |
| Change from baseline | 18.1 (26.8)<br>20 (-40; 100)<br>n = 43 | <b>&lt;.0001</b> | 25.0 (28.0)<br>20 (-20; 100)<br>n = 52 | <b>&lt;.0001</b> | 0.25 | -6.86 (-18.10; 4.35) |

---

Changes from baseline for primary and secondary outcomes in iNPH scale scores at the post-intervention follow-up and the long-term follow-up six months postoperatively. **ITT** intention-to-treat. Bold values indicate significance of  $p \leq 0.05$ . Values are presented as mean (SD), median (min; max) and the difference between groups as mean difference and 95% CI.
