# Supplementary material for: Physical exercise and goal attainment after shunt surgery in idiopathic normal pressure hydrocephalus: a randomised clinical trial
Source: Springer Nature journal article supplement (doi:10.1186/s12987-021-00287-8), 2021-11-22
Supplement: MOESM4 [file 19890032]

### Changes from baseline in primary and secondary iNPH scale scores for the PP population

|                                          | Exercise group<br>(n=28)                   | p-value<br>within<br>group | Control-group<br>(n=58)                     | p value<br>within<br>group | p-value<br>between<br>groups | Difference<br>between groups<br>Mean (95% CI) |
|------------------------------------------|--------------------------------------------|----------------------------|---------------------------------------------|----------------------------|------------------------------|-----------------------------------------------|
| <b>Primary outcome</b>                   |                                            |                            |                                             |                            |                              |                                               |
| Total iNPH scale score (0-100)           |                                            |                            |                                             |                            |                              |                                               |
| Baseline                                 |                                            |                            |                                             |                            |                              |                                               |
| Mean (SD)                                | 56.8 (15.7)                                |                            | 55.6 (16.4)                                 |                            | 0.75                         | 1.25 (-6.12; 8.69)                            |
| Median (min;max)                         | 58.6 (27.2; 88.3)<br>n = 28                |                            | 53.1 (22; 89.6)<br>n = 58                   |                            |                              |                                               |
| Post-intervention                        | 76.7 (14.7)<br>80.5 (37.2; 97.5)<br>n = 28 |                            | 70.5 (15.9)<br>72.7 (34.2; 100)<br>n = 58   |                            | 0.081                        | 6.21 (-0.83; 13.45)                           |
| Change from baseline                     | 19.9 (12.9)<br>16.8 (-0.5; 48.4)<br>n = 28 | <b>&lt;.0001</b>           | 14.9 (12.2)<br>13.4 (-11.5; 53.3)<br>n = 58 | <b>&lt;.0001</b>           | 0.094                        | 4.96 (-0.86; 10.59)                           |
| 6-month follow-up                        | 77.1 (15.9)<br>79.7 (47.2; 99.5)<br>n = 27 |                            | 73.3 (17.3)<br>78.2 (35.2; 99.5)<br>n = 51  |                            | 0.35                         | 3.74 (-4.09; 11.61)                           |
| Change from baseline                     | 20.6 (14.1)<br>16.7 (-3.3; 49.4)<br>n = 27 | <b>&lt;.0001</b>           | 16.7 (12.5)<br>15.2 (-15.7; 41.1)<br>n = 51 | <b>&lt;.0001</b>           | 0.21                         | 3.90 (-2.22; 9.98)                            |
| <b>Secondary outcomes</b>                |                                            |                            |                                             |                            |                              |                                               |
| Gait iNPH scale score (0-100)            |                                            |                            |                                             |                            |                              |                                               |
| Baseline                                 |                                            |                            |                                             |                            |                              |                                               |
| Mean (SD)                                | 51.3 (24.3)<br>48.7 (9.7; 95.3)<br>n = 28  |                            | 51.2 (23.8)<br>43.7 (9.7; 100)<br>n = 58    |                            | 0.59                         | 2.37 (-6.49; 11.22)                           |
| Post-intervention                        | 76.8 (21.1)<br>82 (23; 100)<br>n = 28      |                            | 70.1 (26.0)<br>72.8 (16.3; 100)<br>n = 58   |                            | 0.23                         | 6.71 (-4.28; 17.95)                           |
| Change from baseline                     | 25.4 (17.1)<br>25.8 (-8.3; 66.3)<br>n = 28 | <b>&lt;.0001</b>           | 18.8 (19.4)<br>17 (-18.3; 60.7)<br>n = 58   | <b>&lt;.0001</b>           | 0.13                         | 6.61 (-2.02; 15.19)                           |
| 6-month follow-up                        | 80.1 (22.6)<br>87 (25.7; 100)<br>n = 27    |                            | 72.9 (25.9)<br>82 (16.3; 100)<br>n = 51     |                            | 0.21                         | 7.27 (-4.31; 19.18)                           |
| Change from baseline                     | 28.7 (19.9)<br>29.7 (-0.7; 76.3)<br>n = 27 | <b>&lt;.0001</b>           | 20.6 (19.6)<br>18 (-30; 57.7)<br>n = 51     | <b>&lt;.0001</b>           | 0.092                        | 8.05 (-1.33; 17.46)                           |
| Balance iNPH scale score (0-100)         |                                            |                            |                                             |                            |                              |                                               |
| Baseline                                 |                                            |                            |                                             |                            |                              |                                               |
| Mean (SD)                                | 66.1 (16.0)<br>67 (33; 100)<br>n = 28      |                            | 66.8 (15.9)<br>67 (17; 100)<br>n = 58       |                            | 0.56                         | 1.73 (-4.00; 7.48)                            |
| Post-intervention                        | 78.0 (12.7)<br>83 (50; 100)<br>n = 28      |                            | 74.5 (10.2)<br>67 (50; 100)<br>n = 58       |                            | 0.21                         | 3.48 (-1.78; 8.57)                            |
| Change from baseline                     | 11.8 (19.1)<br>16 (-17; 67)<br>n = 28      | <b>0.0029</b>              | 7.72 (14.96)<br>0 (-17; 50)<br>n = 58       | <b>0.0004</b>              | 0.31                         | 4.10 (-3.61; 11.37)                           |
| 6-month follow-up                        | 81.4 (12.4)<br>83 (67; 100)<br>n = 27      |                            | 74.5 (12.0)<br>83 (33; 100)<br>n = 51       |                            | <b>0.015</b>                 | 6.95 (1.13; 12.71)                            |
| Change from baseline                     | 15.3 (16.0)<br>16 (0; 67)<br>n = 27        | <b>&lt;.0001</b>           | 6.08 (12.79)<br>0 (-34; 34)<br>n = 51       | <b>0.0027</b>              | <b>0.0062</b>                | 9.25 (2.52; 15.74)                            |
| Neuropsychology iNPH scale score (0-100) |                                            |                            |                                             |                            |                              |                                               |

|                                     |                                           |                  |                                           |                  |      |                           |
|-------------------------------------|-------------------------------------------|------------------|-------------------------------------------|------------------|------|---------------------------|
| Baseline                            | 57.4 (19.9)<br>56.3 (20; 87.5)<br>n = 28  |                  | 55.2 (19.3)<br>52.5 (17.5; 95)<br>n = 58  |                  | 0.61 | 1.91 (-5.36; 9.09)        |
| Post-intervention                   | 69.1 (17.5)<br>71.3 (25; 95)<br>n = 28    |                  | 62.8 (19.6)<br>65 (12.5; 100)<br>n = 57   |                  | 0.16 | 6.30 (-2.24; 15.00)       |
| Change from baseline                | 11.7 (9.2)<br>10 (-2.5; 32.5)<br>n = 28   | <b>&lt;.0001</b> | 8.16 (12.31)<br>7.5 (-30; 45)<br>n = 57   | <b>&lt;.0001</b> | 0.19 | 3.54 (-1.71; 8.68)        |
| 6-month follow-up                   | 66.7 (19.1)<br>65 (25; 97.5)<br>n = 27    |                  | 67.0 (20.9)<br>72.5 (17.5; 100)<br>n = 50 |                  | 0.96 | -0.283 (-9.833;<br>9.375) |
| Change from baseline                | 10.4 (11.8)<br>12.5 (-15; 37.5)<br>n = 27 | <b>&lt;.0001</b> | 10.3 (11.1)<br>7.5 (-20; 35)<br>n = 50    | <b>&lt;.0001</b> | 1.00 | 0.070 (-5.294;<br>5.385)  |
| Continence iNPH scale score (0-100) |                                           |                  |                                           |                  |      |                           |
| Baseline                            | 57.9 (25.7)<br>60 (0; 100)<br>n = 28      |                  | 53.4 (30.5)<br>40 (0; 100)<br>n = 58      |                  | 0.18 | 7.98 (-3.48; 19.29)       |
| Post-intervention                   | 82.9 (25.9)<br>100 (0; 100)<br>n = 28     |                  | 74.3 (26.6)<br>80 (0; 100)<br>n = 56      |                  | 0.20 | 8.57 (-3.33; 21.11)       |
| Change from baseline                | 25.0 (28.6)<br>20 (-40; 100)<br>n = 28    | <b>0.0002</b>    | 21.1 (28.4)<br>10 (-20; 100)<br>n = 56    | <b>&lt;.0001</b> | 0.59 | 3.93 (-9.47; 16.84)       |
| 6-month follow-up                   | 77.0 (26.4)<br>80 (0; 100)<br>n = 27      |                  | 79.2 (27.4)<br>100 (0; 100)<br>n = 51     |                  | 0.80 | -2.18 (-14.74;<br>11.00)  |
| Change from baseline                | 20.0 (28.3)<br>20 (-40; 100)<br>n = 27    | <b>0.0012</b>    | 25.5 (28.0)<br>20 (-20; 100)<br>n = 51    | <b>&lt;.0001</b> | 0.46 | -5.49 (-18.82; 7.50)      |

Changes from baseline for primary and secondary outcomes in iNPH scale scores at the post-intervention follow-up and the long-term follow-up six months postoperatively. **PP** Per protocol. Bold values indicate significance of  $p \leq 0.05$ . Values are presented as mean (SD), median (min; max) and the difference between groups as mean difference and 95% CI.
